# Genome-wide transcriptional profiling identifies potential signatures in discriminating active tuberculosis from latent infection

Liping Pan<sup>1</sup>, Na Wei<sup>2</sup>, Hongyan Jia<sup>1</sup>, Mengqiu Gao<sup>3</sup>, Xiaoyou Chen<sup>3</sup>, Rongrong Wei<sup>1</sup>, Qi Sun<sup>1</sup>, Shuxiang Gu<sup>1</sup>, Boping Du<sup>1</sup>, Aiyong Xing<sup>1</sup> and Zongde Zhang<sup>1</sup>

<sup>1</sup>Beijing Chest Hospital, Capital Medical University, Beijing Key Laboratory for Drug Resistant Tuberculosis Research, Beijing Tuberculosis and Thoracic Tumor Research Institute, Beijing 101149, China

<sup>2</sup>Medical Laboratory, Linyi Chest Hospital, Linyi 276000, China

<sup>3</sup>Tuberculosis Department, Beijing Chest Hospital, Capital Medical University, Beijing Tuberculosis and Thoracic Tumor Research Institute, Beijing 101149, China

**Correspondence to:** Zongde Zhang, **email:** zzd417@163.com

**Keywords:** genome-wide transcriptional profiling; signature; tuberculosis; latent tuberculosis infection

**Received:** May 10, 2017

**Accepted:** November 14, 2017

**Published:** December 04, 2017

**Copyright:** Pan et al. This is an open-access article distributed under the terms of the Creative Commons Attribution License 3.0 (CC BY 3.0), which permits unrestricted use, distribution, and reproduction in any medium, provided the original author and source are credited.

## ABSTRACT

To better understand the host immune response involved in the progression from latent tuberculosis infection (LTBI) to active tuberculosis (TB) and identify the potential signatures for discriminating TB from LTBI, we performed a genome-wide transcriptional profile of *Mycobacterium tuberculosis* (M.TB)-specific antigens-stimulated peripheral blood mononuclear cells (PBMCs) from patients with TB, LTBI individuals and healthy controls (HCs). A total of 209 and 234 differentially expressed genes were detected in TB vs. LTBI and TB vs. HCs, respectively. Nineteen differentially expressed genes with top fold change between TB and the other 2 groups were validated using quantitative real-time PCR (qPCR), and showed 94.7% consistent expression pattern with microarray test. Six genes were selected for further validation in an independent sample set of 230 samples. Expression of the resistin (RETN) and kallikrein 1 (KLK1) genes showed the greatest difference between the TB and LTBI or HC groups ( $P < 0.0001$ ). Receiver operating characteristic curve (ROC) analysis showed that the areas under the curve (AUC) for RETN and KLK1 were 0.844 (0.783–0.904) and 0.833 (0.769–0.897), respectively, when discriminating TB from LTBI. The combination of these two genes achieved the best discriminative capacity [AUC = 0.916 (0.872–0.961)], with a sensitivity of 71.2% (58.7%–81.7%) and a specificity of 93.6% (85.7%–97.9%). Our results provide a new potentially diagnostic signature for discriminating TB and LTBI and have important implications for better understanding the pathogenesis involved in the transition from latent infection to TB activation.

## INTRODUCTION

Although great effort has been made to improve the diagnosis and treatment of tuberculosis (TB), mortality and morbidity remains high, with more than 9.0 million new cases and more than 1.5 million deaths worldwide each year [1–3]. *Mycobacterium tuberculosis* (M.TB) infection generally remains asymptomatic as a so called latent tuberculosis infection (LTBI). However, it will reactivate to active TB (5–15%) when individuals are co-infected

with HIV, are using immunosuppressive drugs, have diabetes mellitus and/or a compromised immune system [4–7]. Although host-pathogen interactions determine the outcome of M.TB infection, the immunological factors involved in the host immune response network in M.TB infection and LTBI reactivation have not yet been clearly elucidated. Up to now, there is has not been a useful method for discriminating active TB from LTBI.

Current interferon- $\gamma$  release assays (IGRAs) that detect IFN- $\gamma$  release from T cells in response to 2

*M.TB*-specific antigens (ESAT-6 and CFP-10), including T-SPOT.*TB* and QuantiFERON-*TB*, can accurately determine the presence of *M.TB* infection [8]. However, they cannot further discriminate active TB from LTBI or predict when LTBI will develop into active TB. Previous studies have demonstrated that cytokine and chemokine responses after ESAT-6 and CFP-10 stimulation have the potential to discriminate active TB from LTBI [9–11]. But these studies were limited in their scope in regards to cytokine and chemokine families and ignored the other genes that could have better discriminative potential.

Microarray platforms are capable of reliably and reproducibly measuring the expression of over 40,000 mRNA transcripts, which can encompass all of the known functional human genome [12]. A number of studies using this approach have identified different panels of diagnostic signatures that discriminate active TB from LTBI, including the genes related to IFN signaling, toll-like receptor (TLR), T- and B- cell function, TREM1 signaling and myeloid cell inflammation, *et al* [13–18]. However, these studies screened for signatures in whole peripheral blood or peripheral blood mononuclear cells (PBMCs) without *M.TB*-specific stimulation. Because many kinds of immune cells with different gene expression patterns are included in whole blood, the interpretation of blood-derived transcriptional signatures must be made in the context of the cellular composition, which was varied depending on the ethnic background and the scale of host response to a disease [19–21]. PBMCs have been used to control this variable. But without *M.TB*-specific stimulation, TB-associated transcriptional profiles may be masked in PBMCs by interference from other conditions, such as other diseases or drug use. Furthermore, the discrepancies among these studies may also be attributable to differences in genetic background.

In this study, we aimed to further uncover the host immune factors involved in the progression from LTBI to active TB and identify the potential signatures for discriminating TB from LTBI. Using PBMCs from active TB patients, LTBI individuals and healthy controls (HCs), we performed a genome-wide transcriptional profile analysis of PBMCs stimulated with the *M.TB*-specific antigens, ESAT-6/CFP-10, from which we were able to identify a TB-associated gene profile.

Our results may not only help to identify the immunological factors that may be relevant to the pathogenesis of active TB, but also provide 2 novel genes that may have the potential ability to discriminate active TB from LTBI.

## RESULTS

### Gene profiling of *M.TB*-specific antigen-stimulated PBMCs from active TB, LTBI and HCs

Genome-wide microarray analysis was employed to examine the gene expression profiles of *M.TB*-specific

antigen-stimulated PBMCs from active TB, LTBI and HC groups. The genes that exhibited significant changes in expression (fold change  $\geq 4$  and  $P$ -values  $< 0.05$  between 2 groups) were selected for further analysis (Figure 1A). Comparison of transcriptional profiles indicated that LTBI and HC groups exhibited similar patterns, with only 35 differentially expressed genes. The TB group exhibited a significantly different profile when compared to LTBI ( $n = 209$ ) and HC ( $n = 234$ ) groups. A total of 352 differentially expressed genes were identified when deducting the number of shared genes amongst the 3 pair-wise comparisons. Comparison of TB with the other 2 groups shared the biggest number of differentially expressed genes ( $n = 114$ ). *F3* was the one gene that was shared in all 3 pair-wise comparisons. Unsupervised cluster analysis was performed to determine whether the 352-gene profile could reflect the different statuses of *M.TB* infection (Figure 1B). It showed that the 12 subjects were successfully clustered into 3 groups, and each group matched exactly to the clinical grouping of active TB, LTBI and HCs.

The criteria with fold change  $\geq 2$  and  $P$ -values  $< 0.05$  between 2 groups was also used to select the differentially expressed genes, and it exhibited more differences in each pair-wise comparison (TB vs. LTBI:  $n = 1050$ , TB vs. HCs:  $n = 1256$ , LTBI vs. HCs:  $n = 479$ , respectively. Supplementary Figure 1).

### Bioinformatics analysis

KEGG and GO analysis was performed to further elucidate the biological functions of the differentially expressed genes in the *M.TB*-specific antigen-stimulated PBMCs between TB and the other 2 groups (LTBI and HCs). Of the 209 differentially expressed genes between TB and LTBI, the KEGG pathway analysis screened 6 statistically significant pathways (Bonferroni-corrected  $P < 0.05$ ), while the 234 differentially expressed genes between TB and HCs were annotated to include 2 statistically significant pathways (Bonferroni-corrected  $P < 0.05$ ). Cytokine-cytokine receptor interaction and linoleic acid metabolism were the shared significant pathways between TB and the other 2 groups. Furthermore, the cytokine-cytokine receptor interaction pathway pooled the largest number of genes and presented the most significant difference between TB and the other 2 groups (TB vs. LTBI: included 14 genes and Bonferroni-corrected  $P = 4.394e-04$ ; TB vs. HCs: included 18 genes and Bonferroni-corrected  $P = 4.901e-05$ ) (Supplementary Table 1). With regard to the GO analysis, enrichment  $P$ -value (Bonferroni-corrected  $P < 0.001$ ) and the pooled number of genes (included  $> 20$  genes) were used to rank the GO term. A total of 17 ranked GO terms were detected in the comparison of TB with LTBI, while 24 ranked GO terms were detected in the comparison of TB with HCs. Furthermore, all these GO terms were associated with

biological processes, including in response to stimuli, cell movement, immune response, inflammatory response and defense response (Supplementary Table 2).

### Validation of differentially expressed genes in an independent sample set

In order to validate the microarray results, the differentially expressed genes with higher expression levels (mean normalized values in the microarray test > 10) and top fold changes (> 10) between TB and the other 2 groups were selected to perform qPCR analysis using the same samples in the microarray test. Based on this criterion, 13 differentially expressed genes between TB and LTBI, and 13 differentially expressed genes between TB and HCs were selected (Table 1). Seven genes overlapped, and these genes were all statistically significant in both TB vs. LTBI and TB vs. HCs in microarray test comparisons ( $P < 0.05$ ). All 19 genes were confirmed by qPCR analysis using the samples from the microarray test, and 18 genes (94.7%) showed consistent expression patterns with the microarray results.

The 6 genes (RETN, KLK1, CXCL5, HP, PID1 and CXCL3) that showed statistically significant differences in qPCR analysis (TB vs. LTBI, TB vs. HCs,  $P < 0.05$ ) were further validated in an additional independent sample set, which included 66 TB patients, 78 LTBI individuals and 86 HCs (Table 2). Three genes (RETN, KLK1 and HP) displayed significantly different expression between TB and the other 2 groups, and the regulation patterns were consistent with the microarray study. Among these genes, RETN and KLK1 exhibited a statistically significant difference ( $P < 0.0001$  and fold change > 2) in the comparisons of TB vs. LTBI and TB vs. HCs. Scatter plots of these 2 genes are shown in Figure 2.

### RETN and KLK1 to distinguish TB from LTBI and HCs

Due to the significantly different expression of RETN and KLK1 genes between TB and the other 2 groups, we attempted to detect whether these 2 genes or a combination thereof could discriminate TB from LTBI and HCs. A receiver operating characteristic curve (ROC) analysis was performed to evaluate the discriminative potential of these 2 genes in the validation set (Figure 3 and Table 3). The areas under the curve (AUCs) of RETN and KLK1 were 0.844 (0.783–0.904) and 0.833 (0.769–0.897), respectively, in discriminating TB from the LTBI group, and the AUC values of RETN and KLK1 were 0.908 (0.864–0.951) and 0.853 (0.796–0.911), respectively, in discriminating TB from the HC group. Logistic regression with forward stepwise analysis indicated that RETN and KLK1 were included in the diagnostic model in discriminating TB from the other 2 groups. The AUC values of this combination could reach as high as 0.916

(0.872–0.961) in discriminating TB from LTBI with a sensitivity of 71.2% (58.7%–81.7%) and a specificity of 93.6% (85.7%–97.9%). In regards to discriminating TB from HCs, AUC values of this combination could reach as high as 0.943 (0.908–0.977) with a sensitivity of 84.9% (73.9%–92.5%) and a specificity of 89.5% (81.1%–95.1%). These results revealed that the combination of these genes could achieve better discriminative capacity than any single gene.

## DISCUSSION

The outcome of *M.TB* infection (active TB or LTBI) is based on the interaction between *M.TB* and host immunity. Identifying the immunologic parameters involved in active TB will help improve early diagnosis and facilitate our understanding of the pathogenesis involved in the transition of latent infection to TB activation. In this study, microarray techniques were applied to compare the transcriptional profiles of active TB patients, LTBI and HC individuals. Further qPCR analyses validated our microarray results and confirmed that the expression of RETN and KLK1 genes was significantly different between TB and the other 2 groups (LTBI and HCs). The combination of these 2 genes demonstrated the potential to discriminate TB from LTBI and HCs.

Unlike previous microarray studies using non-stimulated whole blood or PBMCs, our study examined the transcriptional profiles of *M.TB*-specific antigen (ESAT-6/CFP-10)-stimulated PBMCs to investigate gene expression changes between TB and the other 2 groups. ESAT-6 and CFP-10 have been confirmed as specific antigens with good immunogenicity in pathogenic *M.TB* and have been widely used in the IGRA tests and novel skin tests for detecting *M.TB* infection [8, 22, 23]. Compared with tuberculin (PPD)-stimulation, which is a mixture of multiple *M.TB* antigens, stimulation with ESAT-6 and CFP-10 can induce a *M.TB*-specific immune response, while excluding the non-specific immune response triggered by other mycobacterium or BCG vaccination. Furthermore, based on IGRA tests or novel skin tests that discriminate *M.TB* infection from healthy controls, the differentially expressed genes of ESAT-6 and CFP-10-stimulated PBMCs between TB and LTBI may further discriminate the different infection status.

Similar with previous studies [24, 25], the differentially expressed genes between TB and the other 2 groups in our study were primarily associated with stimulus response, indicating the variances of PBMCs in response to *M.TB*-specific antigens between different infection statuses. KEGG analysis showed that differentially expressed genes between TB and the other 2 groups were mainly pooled in cytokine-cytokine receptor pathways, suggesting that the cytokine and cytokine receptor genes are important in TB occurrence and development. These results are consistent with previous

**Table 1: Differentially expressed genes with fold change >10 and higher expression level in the comparison of TB with LTBI and HC groups**

| Genes          | Microarray test |            |         | qPCR validation |            |         |
|----------------|-----------------|------------|---------|-----------------|------------|---------|
|                | Fold Change     | Regulation | P-value | Fold Change     | Regulation | P-value |
| <b>TB/LTBI</b> |                 |            |         |                 |            |         |
| RETN           | 19.71           | Up         | 0.006   | 17.79           | Up         | 0.087   |
| CXCL5          | 20.46           | Up         | 0.013   | 31.07           | Up         | 0.031   |
| HP             | 14.23           | Up         | 0.008   | 4.99            | Up         | 0.038   |
| LCN2           | 13.24           | Up         | 0.007   | 9.53            | Up         | 0.085   |
| S100A12        | 12.71           | Up         | 0.001   | 5.33            | Up         | 0.101   |
| ABCA1          | 59.84           | Up         | 0.0002  | 22.96           | Up         | 0.148   |
| PID1           | 17.68           | Up         | 0.003   | 9.61            | Up         | 0.003   |
| LTF            | 16.56           | Up         | 0.008   | 3.99            | Up         | 0.296   |
| LRRC38         | 15.57           | Up         | 0.003   | 2.51            | Up         | 0.372   |
| MT1JP          | 15.16           | Up         | 0.007   | 8.39            | Up         | 0.235   |
| CD177          | 12.59           | Up         | 0.002   | 1.74            | Up         | 0.235   |
| CXCL3          | 11.20           | Up         | 0.001   | 7.61            | Up         | 0.036   |
| INSM1          | 10.26           | Up         | 0.004   | 4.26            | Up         | 0.050   |
| <b>TB/HCs</b>  |                 |            |         |                 |            |         |
| RETN           | 16.02           | Up         | 0.011   | 15.04           | Up         | 0.048   |
| KLK1           | 0.09            | Down       | 0.046   | 0.07            | Down       | 0.036   |
| CXCL5          | 12.29           | Up         | 0.007   | 6.35            | Up         | 0.023   |
| HP             | 11.65           | Up         | 0.016   | 2.88            | Up         | 0.071   |
| F3             | 22.30           | Up         | 0.005   | 19.98           | Up         | 0.163   |
| CYP3A5         | 16.54           | Up         | 0.001   | 6.18            | Up         | 0.011   |
| CNKS3          | 11.51           | Up         | 0.006   | 6.68            | Up         | 0.218   |
| CYP3A7         | 10.89           | Up         | 0.002   | 0.96            | Down       | 0.862   |
| CA12           | 10.10           | Up         | 0.015   | 3.79            | Up         | 0.155   |
| ABCA1          | 15.13           | Up         | 0.012   | 4.16            | Up         | 0.185   |
| LRRC38         | 20.95           | Up         | 0.002   | 3.20            | Up         | 0.233   |
| MT1JP          | 14.96           | Up         | 0.007   | 9.94            | Up         | 0.201   |
| CD177          | 15.93           | Up         | 0.001   | 3.31            | Up         | 0.063   |

Note: TB, tuberculosis; LTBI, latent tuberculosis infection; HCs, healthy controls.

studies that detected different patterns of cytokines or chemokines between TB and non-TB group (LTBI, HCs or other pulmonary diseases) in response to *M. TB*-specific antigens or *M. TB* strains [9–11]. Recently, a blood RNA signature, including 16 genes for tuberculosis disease risk, has been validated [26]. Two of these 16 genes were also differentially expressed between TB and LTBI in our study (APOL, *P*-value = 0.031; GBP4, *P*-value = 0.044). Kaforou et al found a 27-transcript signature distinguished TB from LTBI using a whole blood RNA microarray [16]. Four of these 27 genes were also differentially expressed between TB and LTBI in our study (GAS6, *P*-value = 0.0076; S100A8, *P*-value = 0.0030; C5, *P*-value = 0.029; FAM20A, *P*-value = 0.028.). Among the 393-gene

signature of active TB from Berry et al [15], 32 genes also presented a significant difference between TB and the other 2 groups in our study. The overlap of genes between previous studies and our study indicates that our microarray test results are reliable.

For the first time, RETN was detected as a differentially expressed gene that is increased in active TB patients compared to LTBI and HC individuals upon stimulation with *M. TB*-specific antigens. RETN is a 12.5 kDa cysteine-rich peptide that is mainly produced by monocytes and macrophages [27]. As a member of the resistin-like molecule (RELM) family, a small family of secreted pro-inflammatory proteins, RETN can trigger a pro-inflammatory state in inflammatory responses,

**Table 2: Validation of the differentially expressed genes in an independent sample set**

| Genes | TB/LTBI     |          | TB/HCs      |           |
|-------|-------------|----------|-------------|-----------|
|       | Fold Change | P-value  | Fold Change | P-value   |
| RETN  | 8.59        | 5.22E-05 | 13.85       | 2.35E-05  |
| KLK1  | 0.44        | 9.18E-09 | 0.43        | 1.17E-013 |
| CXCL5 | 0.40        | 0.007    | 0.51        | 0.009     |
| HP    | 2.18        | 0.035    | 2.16        | 0.040     |
| PID1  | 0.66        | 0.320    | 1.48        | 0.164     |
| CXCL3 | 0.10        | 0.075    | 0.23        | 0.108     |

Note: TB, tuberculosis; LTBI, latent tuberculosis infection; HCs, healthy controls.  
The independent sample set included 66 TB patients, 78 LTBI individuals and 86 HCs.

mediates metabolic disturbances and promotes cell proliferation [28, 29]. Previous studies have suggested that RETN is associated with type 2 diabetes [30, 31], which indicates that RETN could be involved in the host immune response process. It has been reported that RETN can induce production of pro-inflammatory cytokines and chemokines in PBMCs and, can promote macrophage polarization in an independent process [32–34]. In our study, we found that RETN expression was significantly increased in active TB patients compared to LTBI and HC individuals. The higher expression of RETN may induce the increased pro-inflammatory cytokines production, which were also detected in TB patients in our study.

Human tissue kallikreins (KLKs) are a 15-member group of serine proteases. KLK1 is a key component of the kallikrein-kinin system and may activate protease activated receptors (PARs) in inflammatory and cardiovascular diseases [35, 36]. It is well established that KLK1 can prompt Lysyl-bradykinin release from low molecular

weight kininogen through the cleavage of 2 peptide bonds involving Met-Lys and Arg-Ser, which confers to KLK1 the ability to act as both a chymotrypsin and a trypsin-like enzyme [37]. Furthermore, it has been demonstrated that KLK1 can protect against lupus and anti-glomerular basement membrane-specific antibody-induced nephritis in mice and humans [38], indicating KLK1 may be involved in autoimmunity response processes. In our study, KLK1 gene expression was decreased in active TB patients. Although there is no report on the association between KLK1 and active TB, recent microarray analyses have also detected that the expression of KLK11 and KLK12 are decreased in monocyte-derived macrophages (MDMs) from *Mycobacterium bovis*-infected cows [39].

Although the RETN or KLK1 genes alone have moderate performance in discriminating active TB from LTBI and HCs, their discriminative ability was enhanced when these 2 genes were combined. The immunological changes that occur when transitioning from a healthy

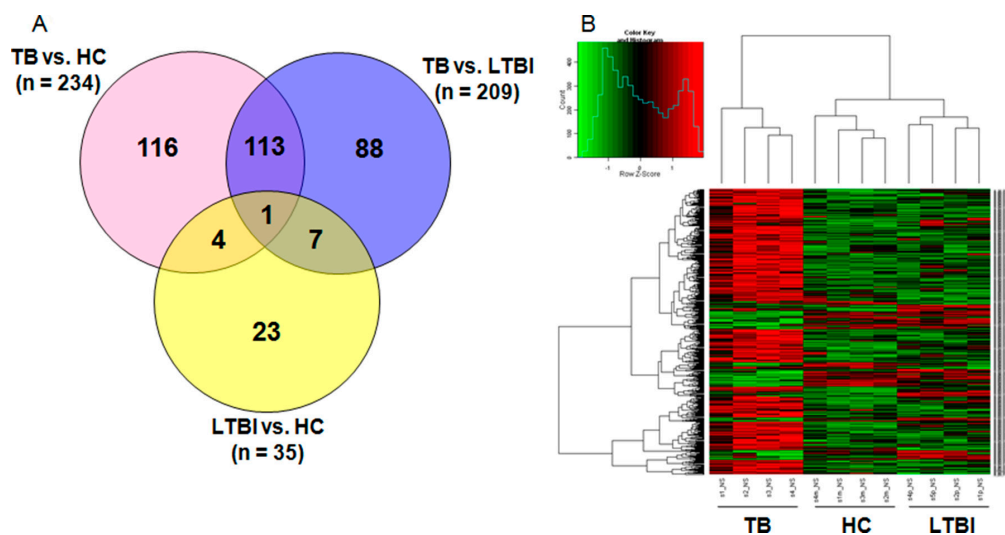

**Figure 1: Genome-wide gene profile of *M.TB*-specific antigen-stimulated PBMCs from active TB, LTBI and HCs. (A)** Differentially expressed genes with  $P$ -value  $< 0.05$  and fold change  $> 4$  in pair-wise comparisons; **(B)** Unsupervised cluster analysis of 352 differentially expressed genes in the pair-wise comparisons. Note: TB, tuberculosis; LTBI, latent tuberculosis infection; HCs, healthy controls.

**Table 3: ROC analysis of RETN and KLK1 genes for discriminating TB from LTBI and HC groups**

| Signatures            | AUC (95% CI)        | Sensitivity (95% CI) | Specificity (95% CI) |
|-----------------------|---------------------|----------------------|----------------------|
| <b>TB vs. LTBI</b>    |                     |                      |                      |
| RETN                  | 0.844(0.783–0.904)  | 74.2 (62.0–84.2)     | 71.8 (60.5–81.4)     |
| KLK1                  | 0.833 (0.769–0.897) | 75.8 (63.6–85.5)     | 74.4 (63.2–83.6)     |
| RETN-KLK1 Combination | 0.916 (0.872–0.961) | 71.2 (58.7–81.7)     | 93.6 (85.7–97.9)     |
| <b>TB vs. HCs</b>     |                     |                      |                      |
| RETN                  | 0.908 (0.864–0.951) | 93.9 (85.2– 98.3)    | 73.3 (62.6–82.2)     |
| KLK1                  | 0.853 (0.796–0.911) | 81.8 (70.4– 90.2)    | 70.9 (60.1–80.2)     |
| RETN-KLK1 Combination | 0.943 (0.908–0.977) | 84.9 (73.9–92.5)     | 89.5 (81.1– 95.1)    |

Note: TB, tuberculosis; LTBI, latent tuberculosis infection; HCs, healthy controls; ROC, receiver operating characteristic curve; AUC, the area under the ROC curve.

status to *M.TB* infection and then to active TB are undoubtedly comprehensive and complicated. Thus, it is unrealistic to rely on one single gene to accurately diagnose active TB. The combination of multiple genes will substantially achieve better diagnostic performance [40]. Previous studies on discovering the biomarkers for active TB diagnosis have also detected a panel of genes that have better discriminative ability [15, 16, 26].

To our knowledge, this is the first study using *M.TB*-specific antigen (ESAT-6/CFP-10)-stimulated PBMCs to elucidate the differences of human immune responses between active TB, LTBI and healthy controls. Notably, our study was performed in a Chinese population, whereas previous studies were performed in European and South African populations that have different genetic and TB epidemiology backgrounds. However, there are some limitations in our study. First, due to the small number of the samples in the microarray set, the

effect of inter-individual differences cannot be avoided, although independent sample sets were used to validate the microarray results. Second, although the number of differentially expressed genes between TB and the other groups in the microarray test were numerous, only the genes with top fold change were selected for validation by qPCR. We cannot exclude the genes with moderate fold change may also provide discriminative value. Third, there is lack of controls for non-TB pulmonary diseases. Further studies with well-designed patient and control groups are required to validate the usefulness of the identified genes for TB. Lastly, a blinded sample set was not used when validating the discriminative ability of RETN and KLK1. A further study utilizing a larger sample size and blinded analyses should be performed to validate the combination of RETN and KLK1.

In conclusion, our study uncovered a genome-wide expression profile of *M.TB*-specific antigen-

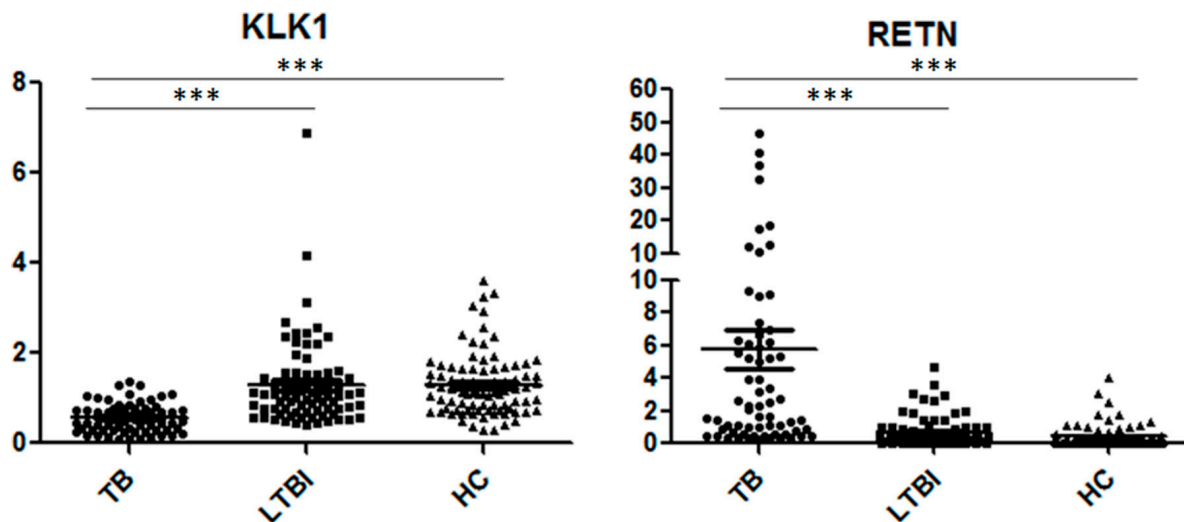

**Figure 2: Scatter plots of RETN and KLK1 gene expression values in comparison of TB with LTBI and HCs by qPCR.** Note: TB, tuberculosis; LTBI, latent tuberculosis infection; HCs, healthy controls. \*\*\* $P < 0.0001$ ; Horizontal bar, the relative expression value of validated genes. The mRNA values of the validated genes were normalized to the housekeeping gene *GAPDH*. The numbers of participants in validation test were the following: TB,  $n = 66$ ; LTBI,  $n = 78$ ; HCs,  $n = 86$ .

**Table 4: Demographic characteristics of the study participants**

| Study complex          | Characters             | TB         | LTBI       | HCs        |
|------------------------|------------------------|------------|------------|------------|
| Microarray set         | n                      | 4          | 4          | 4          |
|                        | Male/female            | 1/3        | 0/4        | 0/4        |
|                        | Age (median, range)    | 35 (33–39) | 36 (32–42) | 38 (33–44) |
|                        | BMI (mean ± SD)        | 23.3 ± 0.8 | 23.6 ± 3.4 | 23.6 ± 3.6 |
|                        | Smokers/non-smokers    | 0/4        | 0/4        | 0/4        |
|                        | BCG vaccination, n (%) | 4 (100)    | 4 (100)    | 4(100)     |
|                        | Validation set         | n          | 66         | 78         |
| Male/female            |                        | 40/26      | 48/30      | 47/39      |
| Age (median, range)    |                        | 35 (18–70) | 38 (23–61) | 34 (19–60) |
| BMI (mean ± SD)        |                        | 20.6 ± 3.1 | 23.6 ± 3.1 | 23.3 ± 3.3 |
| Smokers/non-smokers    |                        | 23/43      | 18/60      | 19/67      |
| BCG vaccination, n (%) |                        | 64 (97.0)  | 73 (93.6)  | 81 (94.2)  |

Note: TB, tuberculosis; LTBI, latent tuberculosis infection; HCs, healthy controls; n, number of subjects; SD, standard deviation; BMI, body mass index.

stimulated PBMCs in different *M. TB* infection statuses and identified the combination of RETN and KLK1 genes to have potential value in distinguishing active TB from LTBI individuals and healthy controls. These results provide a new potential diagnostic signature for discriminating active TB and LTBI and have important implications for better understanding the pathogenesis involved in the transition from latent infection to TB activation.

## MATERIALS AND METHODS

### Subjects

Active TB patients were recruited from Beijing Chest Hospital between May 2009 and September 2017. All TB patients were recruited with typical TB clinical symptoms, chest radiograph revealing TB lesion, at least 2 consecutive positive sputum smears or

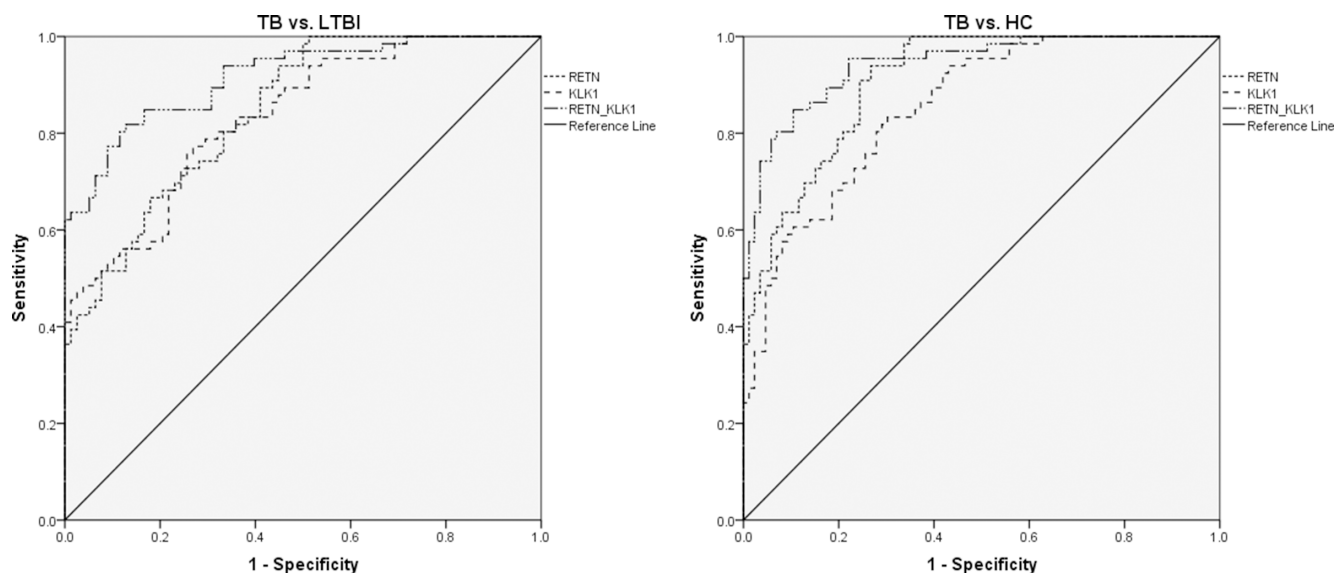

**Figure 3: The discriminative performance of RETN and KLK1 genes in discriminating TB from LTBI and HCs by receiver operating characteristic curve (ROC) analysis.** Note: TB, tuberculosis; LTBI, latent tuberculosis infection; HCs, healthy controls. The numbers of participants were the following: TB,  $n = 66$ ; LTBI,  $n = 78$ ; HCs,  $n = 86$ . The receiver operating characteristic curve depicts the sensitivity and specificity of the potential signatures in discriminating TB from LTBI and HCs. The area under the ROC curve (AUC) in discriminating TB from LTBI: RETN, 0.844 (0.783–0.904); KLK1, 0.833 (0.769–0.897); Combination of RETN and KLK1, 0.916 (0.872–0.961). The AUCs in discriminating TB from HCs: RETN, 0.908 (0.864–0.951); KLK1, 0.853 (0.796–0.911); Combination of RETN and KLK1, 0.943 (0.908–0.977).

a positive sputum culture. They had not received anti-TB treatment within the past 30 days. LTBI individuals and healthy controls were recruited from TB screening campaigns, which were conducted in Beijing between November 2009 and September 2017. LTBI individuals satisfied the following criteria: positive tuberculin skin test (TST) and T-SPOT.TB results, normal chest radiograph, and without any clinical evidence of active TB and other diseases. Healthy controls were people with negative TST and T-SPOT.TB tests, normal chest radiograph and no clinical symptoms of diseases. Individuals with positive human immunodeficiency virus (HIV), positive hepatitis B virus (HBV) or hepatitis C virus (HCV), diabetes, malignancies, severe autoimmune diseases, and those who took immunosuppressive or immunopotentiator agents, or were in pregnancy or lactation were excluded.

In the microarray study, 12 subjects were enrolled within 3 groups: active TB ( $n = 4$ ), LTBI ( $n = 4$ ), and HCs ( $n = 4$ ). Additional 66 active TB patients, 78 LTBI individuals, and 86 HCs were enrolled for further qPCR validation. The demographic characteristics of all 242 participants in this study are shown in Table 4. This study was performed in accordance with the guidelines of the Helsinki Declaration and was approved by the Ethics Committee of the Beijing Chest Hospital, Capital Medical University. Written informed consents were obtained from each participant before blood sample collection.

### **PBMCs isolation and *in vitro* stimulation**

Peripheral blood samples (6ml) were collected in heparin-containing vacutainer tubes from each subject. PBMCs were separated by density gradient using Lympholyte Cell Separation Media (Tianjin Haoyang Biological Manufacture Co., Ltd, China) within 6 hours of blood collection. The number of live cells were counted using Muse Cell Analyzer (Merck & Millipore, Germany). PBMCs were cultured with AIM-V (Invitrogen Life Technology, USA) containing 2mM L-glutamine, 50 ug/ml streptomycin sulfate, 10 ug/ml gentamicin sulfate, and stimulated with 10 ug/ml purified *M.TB*-specific antigens ESAT-6/CFP-10 for 24 h at 37 °C in a humidified incubator with 5% CO<sub>2</sub> [11].

### **RNA extraction**

Total RNA was extracted from PBMCs using the miRNeasy® Mini kit (QIAGEN, Germany) according to the protocols recommended by the manufacturer. RNase-free DNase I (QIAGEN, Germany) was used to remove the genomic DNA contamination. The integrity and quality of RNA was evaluated using an Agilent 2100 Bioanalyzer (Agilent Technology). RNA with a 2100 RIN (RNA integrity number)  $\geq 7.0$  and 28S/18S  $> 0.7$  was used for the microarray study and qPCR validation.

### **Microarray test and bioinformatics analysis**

RNA samples from each group were used to generate fluorescence labeled cRNA targets for the Agilent Whole Human Genome Oligo Microarray (4 × 44 K, including ~41,000 genes and transcripts). Labeled cRNA targets were then hybridized with the slides. After hybridization, slides were scanned on the Agilent Microarray Scanner (Agilent technologies, Santa Clara, CA, USA). Data were extracted with Feature Extraction software 10.7 (Agilent technologies, Santa Clara, CA, USA). Raw data were normalized by Quantile algorithm, GeneSpring Software 12.6.1 (Agilent technologies, Santa Clara, CA, US). The microarray experiments were performed by following the protocol of Agilent technologies Inc. at Shanghai Biotechnology Corporation. The microarray data was deposited in GEO database: GSE98461.

Fold changes of gene expression values were calculated in 2 pair-wise comparisons. Differentially expressed genes were identified and selected for further analysis based on the  $P$ -value  $< 0.05$  and with a fold change of at least 2 or more. The selected genes were grouped in functional categories based on Gene Ontology database (GO: <http://www.geneontology.org/>), and functional pathways (KEGG) were also analyzed by using online SAS analysis system.

### **Quantitative real-time PCR analysis**

A total of 200 ng of purified RNA was reverse transcribed to cDNA using SuperRT cDNA Synthesis Kit (CWbio.Co., Ltd, China) according to the manufacturer's protocol. SYBR Green (Power SYBR Green PCR Master Mix, Applied Biosystems, Inc.) uptake in double-stranded DNA was measured using the ABI 7900 Real-time PCR System (Applied Biosystems, Inc.). We calculated  $2^{-\Delta\Delta CT}$  and used this statistic to determine relative gene expression. The reference gene was GAPDH. The primer sequences of the target genes in the qPCR analysis are shown in Supplementary Table 3.

### **Data analysis**

The differentially expressed genes between the 2 groups were analyzed using the  $t$ -test. The receiver operating characteristic curve (ROC) analysis was performed to determine the discriminative ability of selected genes to distinguish TB from LTBI and HCs, with the overall accuracy assessed by the area under the ROC curve (AUC) values. Significance was inferred for  $P < 0.05$ . All statistical analysis was performed using the commercial statistical software SPSS version 21.0 (SPSS, Inc., Chicago, IL, USA).

### **Author contributions**

L.P.P., H.Y.J., R.R.W., Q.S. and B.P.D. conducted the experiments. M.Q.G., X.Y.C., S.X.G. and A.Y.X. enrolled



the subjects. L.P.P. and Z.D.Z. designed the experiments. L.P.P. and N.W. analyzed the data and wrote the paper.

## ACKNOWLEDGMENTS

We thank all the subjects who participated in this study.

## CONFLICTS OF INTEREST

There are no conflicts of interest to disclose.

## FUNDING

This work was supported by grants from the Beijing Natural Science Foundation (No. 7164245), the Beijing Nova Program (No. Z161100004916080), the National Science and Technology Major Project of China (No. 2015ZX10004801-003), the Collaborative Innovation Center of Infectious Diseases (No. PXM2016\_014226\_000052), the 'Beijing Municipal Administration of Hospitals' Youth Programme (No. QML20151501), Tongzhou District Science and Technology Committee (No. KJ2017CX076), and the 'Beijing Municipal Administration of Hospitals' Ascent Plan (No. DFL20151501).

## REFERENCES

1. WHO. World Health Organization: Global Tuberculosis Report 2014.
2. WHO. World Health Organization: Global Tuberculosis Report 2015.
3. WHO. World Health Organization: Global Tuberculosis Report 2016.
4. Getahun H, Matteelli A, Chaisson RE, Ravigliione M. Latent Mycobacterium tuberculosis infection. *N Engl J Med*. 2015; 372:2127–35.
5. Barry CE 3rd, Boshoff HI, Dartois V, Dick T, Ehrt S, Flynn J, Schnappinger D, Wilkinson RJ, Young D. The spectrum of latent tuberculosis: rethinking the biology and intervention strategies. *Nat Rev Microbiol*. 2009; 7:845–55.
6. Walzl G, Ronacher K, Hanekom W, Scriba TJ, Zumla A. Immunological biomarkers of tuberculosis. *Nat Rev Immunol*. 2011; 11:343–54.
7. Wood R, Lawn SD, Caldwell J, Kaplan R, Middelkoop K, Bekker LG. Burden of new and recurrent tuberculosis in a major South African city stratified by age and HIV-status. *PLoS One*. 2011; 6:e25098.
8. Diel R, Goletti D, Ferrara G, Bothamley G, Cirillo D, Kampmann B, Lange C, Losi M, Markova R, Migliori GB, Nienhaus A, Ruhwald M, Wagner D, et al. Interferon-gamma release assays for the diagnosis of latent Mycobacterium tuberculosis infection: a systematic review and meta-analysis. *Eur Respir J*. 2011; 37:88–99.
9. Kellar KL, Gehrke J, Weis SE, Mahmutovic-Mayhew A, Davila B, Zajdowicz MJ, Scarborough R, LoBue PA, Lardizabal AA, Daley CL, Reves RR, Bernardo J, Campbell BH, et al. Multiple cytokines are released when blood from patients with tuberculosis is stimulated with Mycobacterium tuberculosis antigens. *PLoS One*. 2011; 6:e26545.
10. Xiong W, Dong H, Wang J, Zou X, Wen Q, Luo W, Liu S, He J, Cai S, Ma L. Analysis of Plasma Cytokine and Chemokine Profiles in Patients with and without Tuberculosis by Liquid Array-Based Multiplexed Immunoassays. *PLoS One*. 2016; 11:e0148885.
11. Yu Y, Zhang Y, Hu S, Jin D, Chen X, Jin Q, Liu H. Different patterns of cytokines and chemokines combined with IFN-gamma production reflect Mycobacterium tuberculosis infection and disease. *PLoS One*. 2012; 7:e44944.
12. Mejias A, Ramilo O. Transcriptional profiling in infectious diseases: ready for prime time? *J Infect*. 2013; 68 Suppl 1:S94–9.
13. Jacobsen M, Repsilber D, Gutschmidt A, Neher A, Feldmann K, Mollenkopf HJ, Ziegler A, Kaufmann SH. Candidate biomarkers for discrimination between infection and disease caused by Mycobacterium tuberculosis. *J Mol Med (Berl)*. 2007; 85:613–21.
14. Ottenhoff TH, Dass RH, Yang N, Zhang MM, Wong HE, Sahiratmadja E, Khor CC, Alisjahbana B, van Crevel R, Marzuki S, Seielstad M, van de Vosse E, Hibberd ML. Genome-wide expression profiling identifies type 1 interferon response pathways in active tuberculosis. *PLoS One*. 2012; 7:e45839.
15. Berry MP, Graham CM, McNab FW, Xu Z, Bloch SA, Oni T, Wilkinson KA, Banchereau R, Skinner J, Wilkinson RJ, Quinn C, Blankenship D, Dhawan R, et al. An interferon-inducible neutrophil-driven blood transcriptional signature in human tuberculosis. *Nature*. 2010; 466:973–7.
16. Kaforou M, Wright VJ, Oni T, French N, Anderson ST, Bangani N, Banwell CM, Brent AJ, Crampin AC, Dockrell HM, Eley B, Heyderman RS, Hibberd ML, et al. Detection of tuberculosis in HIV-infected and -uninfected African adults using whole blood RNA expression signatures: a case-control study. *PLoS Med*. 2013; 10:e1001538.
17. Maertzdorf J, Repsilber D, Parida SK, Stanley K, Roberts T, Black G, Walzl G, Kaufmann SH. Human gene expression profiles of susceptibility and resistance in tuberculosis. *Genes Immun*. 2011; 12:15–22.
18. Mistry R, Cliff JM, Clayton CL, Beyers N, Mohamed YS, Wilson PA, Dockrell HM, Wallace DM, van Helden PD, Duncan K, Lukey PT. Gene-expression patterns in whole blood identify subjects at risk for recurrent tuberculosis. *J Infect Dis*. 2007; 195:357–65.
19. Blankley S, Berry MP, Graham CM, Bloom CI, Lipman M, O'Garra A. The application of transcriptional blood signatures to enhance our understanding of the host response to infection: the example of tuberculosis. *Philos Trans R Soc Lond B Biol Sci*. 2014; 369:20130427.

20. Loven J, Orlando DA, Sigova AA, Lin CY, Rahl PB, Burge CB, Levens DL, Lee TI, Young RA. Revisiting global gene expression analysis. *Cell*. 2012; 151:476–82.
21. Rougemont A, Boisson ME. Letter: Racial differences in leucocyte count. *Br Med J*. 1975; 2:684–5.
22. Ruhwald M, Aggerbeck H, Gallardo RV, Hoff ST, Villate JI, Borregaard B, Martinez JA, Kromann I, Penas A, Anibarro LL, de Souza-Galvao ML, Sanchez F, Rodrigo-Pendas JA, et al. Safety and efficacy of the C-Tb skin test to diagnose *Mycobacterium tuberculosis* infection, compared with an interferon gamma release assay and the tuberculin skin test: a phase 3, double-blind, randomised, controlled trial. *Lancet Respir Med*. 2017; 5:259–68.
23. Machingaidze S, Wiysonge CS, Gonzalez-Angulo Y, Hatherill M, Moyo S, Hanekom W, Mahomed H. The utility of an interferon gamma release assay for diagnosis of latent tuberculosis infection and disease in children: a systematic review and meta-analysis. *Pediatr Infect Dis J*. 2011; 30:694–700.
24. Liu K, Zhang Y, Hu S, Yu Y, Yang Q, Jin D, Chen X, Jin Q, Liu H. Increased levels of BAFF and APRIL related to human active pulmonary tuberculosis. *PLoS One*. 2012; 7:e38429.
25. Lu C, Wu J, Wang H, Wang S, Diao N, Wang F, Gao Y, Chen J, Shao L, Weng X, Zhang Y, Zhang W. Novel biomarkers distinguishing active tuberculosis from latent infection identified by gene expression profile of peripheral blood mononuclear cells. *PLoS One*. 2011; 6:e24290.
26. Zak DE, Penn-Nicholson A, Scriba TJ, Thompson E, Suliman S, Amon LM, Mahomed H, Erasmus M, Whatney W, Hussey GD, Abrahams D, Kafaar F, Hawkrigde T, et al. A blood RNA signature for tuberculosis disease risk: a prospective cohort study. *Lancet*. 2016; 387:2312–22.
27. Stepan CM, Brown EJ, Wright CM, Bhat S, Banerjee RR, Dai CY, Enders GH, Silberg DG, Wen X, Wu GD, Lazar MA. A family of tissue-specific resistin-like molecules. *Proc Natl Acad Sci U S A*. 2001; 98:502–6.
28. Codoner-Franch P, Alonso-Iglesias E. Resistin: insulin resistance to malignancy. *Clin Chim Acta*. 2015; 438:46–54.
29. Filkova M, Haluzik M, Gay S, Senolt L. The role of resistin as a regulator of inflammation: Implications for various human pathologies. *Clin Immunol*. 2009; 133:157–70.
30. Fontana A, Ortega Moreno L, Lamacchia O, De Bonis C, Salvemini L, De Cosmo S, Cignarelli M, Copetti M, Trischitta V, Menzaghi C. Serum resistin is causally related to mortality risk in patients with type 2 diabetes: preliminary evidences from genetic data. *Sci Rep*. 2017; 7:61.
31. Menzaghi C, Bacci S, Salvemini L, Mendonca C, Palladino G, Fontana A, De Bonis C, Marucci A, Goheen E, Prudente S, Morini E, Rizza S, Kanagaki A, et al. Serum resistin, cardiovascular disease and all-cause mortality in patients with type 2 diabetes. *PLoS One*. 2014; 8:e64729.
32. Zuniga MC, Raghuraman G, Hitchner E, Weyand C, Robinson W, Zhou W. PKC-epsilon and TLR4 synergistically regulate resistin-mediated inflammation in human macrophages. *Atherosclerosis*. 2017; 259:51–9.
33. Bokarewa M, Nagaev I, Dahlberg L, Smith U, Tarkowski A. Resistin, an adipokine with potent proinflammatory properties. *J Immunol*. 2005; 174:5789–95.
34. Silswal N, Singh AK, Aruna B, Mukhopadhyay S, Ghosh S, Ehtesham NZ. Human resistin stimulates the pro-inflammatory cytokines TNF-alpha and IL-12 in macrophages by NF-kappaB-dependent pathway. *Biochem Biophys Res Commun*. 2005; 334:1092–101.
35. Sotiropoulou G, Pampalakis G, Diamandis EP. Functional roles of human kallikrein-related peptidases. *J Biol Chem*. 2009; 284:32989–94.
36. Hollenberg MD, Oikonomopoulou K, Hansen KK, Saifeddine M, Ramachandran R, Diamandis EP. Kallikreins and proteinase-mediated signaling: proteinase-activated receptors (PARs) and the pathophysiology of inflammatory diseases and cancer. *Biol Chem*. 2008; 389:643–51.
37. Barros TG, Santos JA, de Souza BE, Sodero AC, de Souza AM, da Silva DP, Rodrigues CR, Pinheiro S, Dias LR, Abraham-Vieira B, Puzer L, Muri EM. Discovery of a new isomannide-based peptidomimetic synthesized by Ugi multicomponent reaction as human tissue kallikrein 1 inhibitor. *Bioorg Med Chem Lett*. 2017; 27:314–8.
38. Liu K, Li QZ, Delgado-Vega AM, Abelson AK, Sanchez E, Kelly JA, Li L, Liu Y, Zhou J, Yan M, Ye Q, Liu S, Xie C, et al. Kallikrein genes are associated with lupus and glomerular basement membrane-specific antibody-induced nephritis in mice and humans. *J Clin Invest*. 2009; 119:911–23.
39. Lin J, Zhao D, Wang J, Wang Y, Li H, Yin X, Yang L, Zhou X. Transcriptome changes upon *in vitro* challenge with *Mycobacterium bovis* in monocyte-derived macrophages from bovine tuberculosis-infected and healthy cows. *Vet Immunol Immunopathol*. 2015; 163:146–56.
40. Wallis RS, Pai M, Menzies D, Doherty TM, Walzl G, Perkins MD, Zumla A. Biomarkers and diagnostics for tuberculosis: progress, needs, and translation into practice. *Lancet*. 2010; 375:1920–37.
